# Supplementary material for: Ankle perturbation generates bilateral alteration of knee muscle onset times after unilateral anterior cruciate ligament reconstruction
Source: PeerJ. 2018 Jul 31;6:e5310. doi: 10.7717/peerj.5310 (PMC6074771; doi:10.7717/peerj.5310)
Supplement: Data S1 [file peerj-06-5310-s001.xlsx]

## Sheet: ACLR
ONSET TIMES IN MILISECONDS
	VM		ST		Concomitant injury repaired in the same surgey		Time from injury to surgery (months)	Time from surgery to evaluation (months)
Subject ID	Involved	Uninvolved	Involved	Uninvolved
s1	161	140	160	147	Lateral Collateral Ligament		2	10
s2	100	149	80	151			4	8
s3	108	102	117	112			3	7
s4	114	156	131	149			5	7
s5	120	125	144	125			2	7
s6	68	99	77	82			3	7
s7	90	65	92	68			4	7
s8	76	80	85	71	Meniscus repair		3	12
s9	84	96	95	106			3	8
s10	133	85	108	84			3	10
s11	80	80	130	82			4	9
s12	77	87	80	86			3	7
s13	80	70	82	70			4	10
s14	90	85	75	100			4	16
s15	70	96	66	112			5	7
s16	83	90	90	100			3	7
s17	122	158	126	151			4	6
s18	123	101	117	110			3	22
s19	78	80	82	100			2	7
s20	132	105	129	92	Posterior Cruciate Ligament Repair		2	8
s21	96	84	85	95			5	6
s22	70	90	70	100	Meniscus repair		3	14
s23	70	100	75	105			2	6
s24	186	108	158	157	Partial menisectomy		3	7
s25	86	80	88	62			5	7
							3.36	8.88
							0.994987	3.70045

## Sheet: CONTROL
ONSET TIMES IN MILISECONDS
	VM		ST
Subject ID	c Involved	c Uninvolved	c Involved	c Uninvolved
c1	76	86	82	84
c2	63	79	68	77
c3	81	66	90	72
c4	63	56	74	72
c5	77	76	63	64
c6	78	91	80	81
c7	77	82	68	74
c8	57	56	87	81
c9	57	73	67	54
c10	56	77	63	64
c11	68	73	72	70
c12	77	86	82	84
c13	63	79	68	77
c14	81	66	90	72
c15	63	56	74	72
c16	77	73	63	64
c17	78	91	80	81
c18	77	82	68	74
c19	56	56	87	81
c20	57	73	67	54
c21	57	77	68	77
c22	68	76	63	70
c23	76	86	82	77
c24	63	79	68	77
c25	81	66	90	72
